# Supplementary material for: Derivatives of dipyrido[3,2-a:2′,3′-c]phenazine and its ruthenium complexes, influence of arylic substitution on photophysical properties
Source: Royal Society of Chemistry journal article supplement (doi:10.1039/b512773d), 2006-01-01
Supplement: b512773d.pdf [file b512773d.pdf]

## Supporting information Schäfer et al. 2005

### Experimental Section

#### General.

Unless otherwise noted, all Pd catalyzed crosscoupling reactions were conducted under an atmosphere of dry, deoxygenated argon using standard Schlenk techniques. Acetonitrile was distilled from CaH<sub>2</sub>. Toluene was distilled from sodium benzophenone ketyl under an argon atmosphere prior to use. All other solvents were used as received.

Infrared spectra were recorded using a Perkin-Elmer 2000 FT-IR; <sup>1</sup>H-NMR spectra were recorded on a Bruker 400 MHz/200 Mhz spectrophotometer, UV/Visible spectra were obtained using a AnalytikJena specord S600 UV-vis. Emission spectra were recorded using a Perkin-Elmer LS50B spectrometer equipped with a Hamamatsu R928 red-sensitive detector. The mass spectra were recorded using a SSQ 170, Finigan Mat at the Friedrich Schiller University Jena. Electrospray-Mass spectra were recorded on a Finnigan MAT, MAT 95 XL. The positive ES mass spectra were obtained with voltages of 3-4kV applied to the electrospray needle. The microwave assisted reactions were carried out using a Microwave Laboratory Systems MLS EM-2 microwave system.

#### dppzBr<sub>2</sub> L1

---

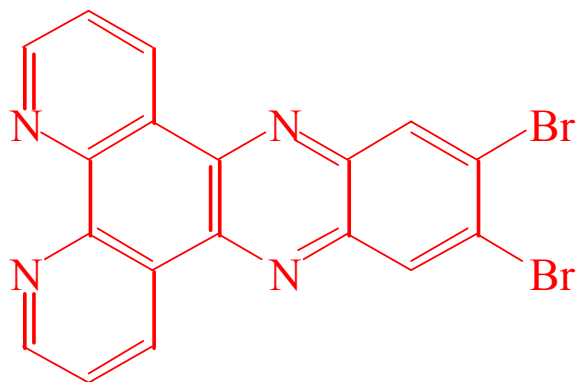

#### <sup>1</sup>H-NMR (ppm; CDCl<sub>3</sub>)

7,730 phen(2H, dd);

8,559 H4(2H, s);

9,233 phen(2H, d(lc));

9,529 phen(2H, d(lc));

**EI-MS** m/z = 440 (100%) corresponding pattern

### dppz(Ph)<sub>2</sub> L2

---

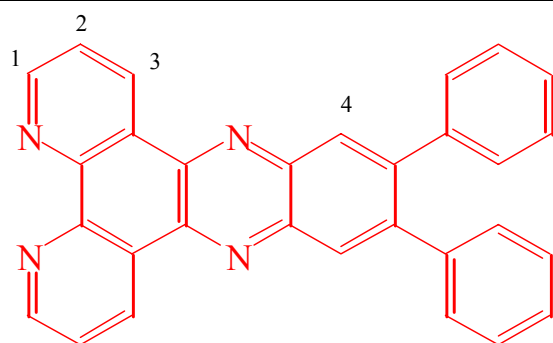

### <sup>1</sup>H-NMR

7,305 phenyl (10H, s)  
7,808 H2-phen (2H, dd)  
8,363 H4 (2H, s)  
9,300 H3-phen (2H, d)  
9,626 H1-phen (2H, d)

### MS(DEI, EI +Q1MS)

m/z = 434 (100%)

### dppz(BPh)<sub>2</sub> L3

---

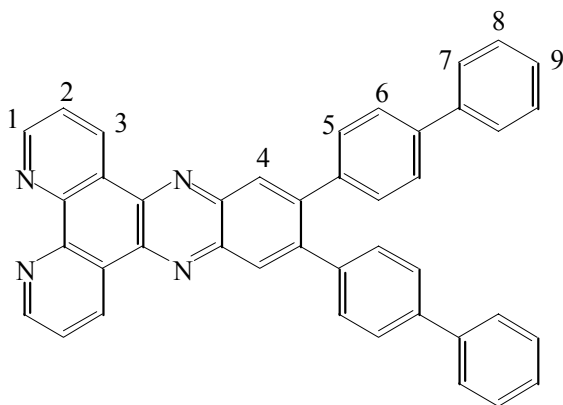

### <sup>1</sup>H-NMR (d<sub>6</sub>-DMSO, δ = 2,485 ppm, T = 300K)

7,43 H7, H8, H9 (10H, m)  
7,70 H6, H5 (8H, m)  
7,91 H2(2H, dd);  
8,31 H4(2H, s);  
9,19 H3(2H, d(lc));  
9,44 H1(2H, d(lc));

### MS(DEI, EI +Q1MS)

m/z = 586 (100%)

**dppz(TBPh)<sub>2</sub> L4**

---

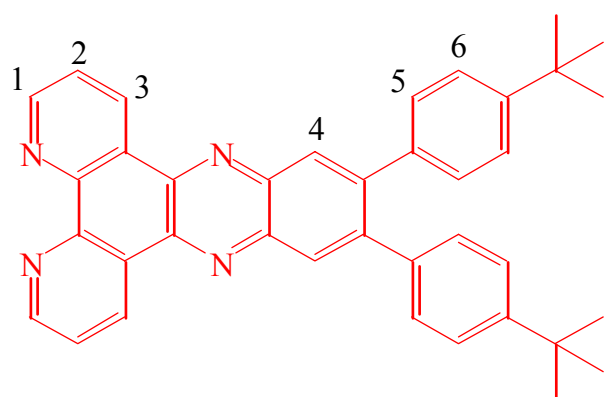

C<sub>38</sub>H<sub>34</sub>N<sub>4</sub>  
546,704  
C 83,48; H 6,27; N 10,25

**<sup>1</sup>H-NMR (CD<sub>2</sub>Cl<sub>2</sub>, δ = 5,336 ppm, T = 300°C)**

1,321 CH<sub>3</sub> (tert.-butyl, 18H, s)  
7,325 H<sub>6</sub>, H<sub>5</sub>(8H, m);  
7,794 H<sub>3</sub> (2H, dd);  
8,361 H<sub>4</sub> (2H, s);  
9,215 H<sub>3</sub> (2H, d(lc));  
9,622 H<sub>1</sub> (2H, d(lc));

**MS(DEI, EI +Q1MS LMR UP LR)**

m/z = 546 (30%), m/z = 531 (35%), m/z = 475 (35%)

**(tbbpy)<sub>2</sub>Ru(dppz(Br)<sub>2</sub>) RuL1**

---

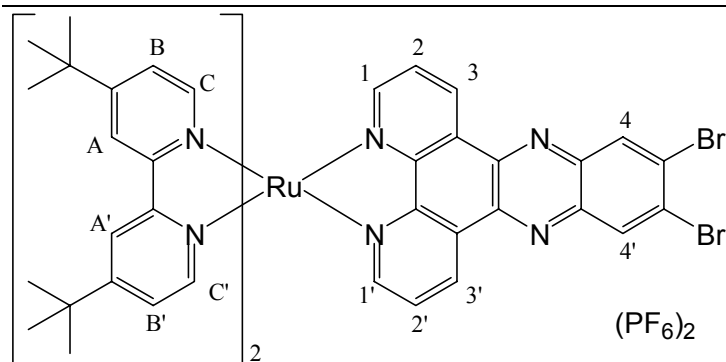

CD<sub>3</sub>CN 400MHz]

1,347 CH<sub>3</sub>bpy (tert.-butyl, 18H, s)  
1,441 CH<sub>3</sub>bpy (tert.-butyl, 18H, s)  
7,233 HBbpy (2H, d);  
7,466 HB'bpy (2H, d);  
7,565 HA bpy (2H, d);  
7,659 HA'bpy (2H, d);

7,888 H2phen (2H, dd);  
8,143 H3phen (2H,d);  
8,476 HC bpy (2H, s);  
8,515 HC' bpy (2H, s);  
8,844 H4 (2H, s);  
9,556 H1phen (2H, d);

(tbbpy)<sub>2</sub>Ru(dppz(Ph)<sub>2</sub>) RuL2

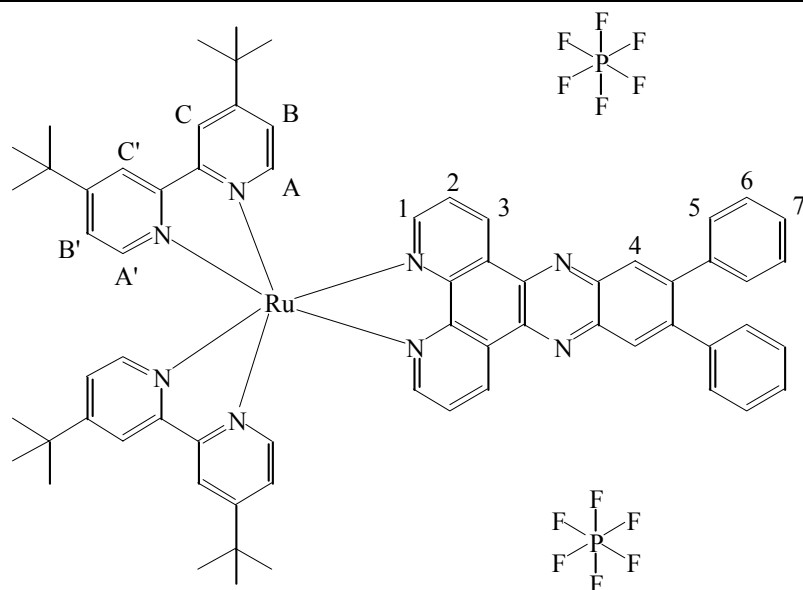

**<sup>1</sup>H-NMR (d<sub>3</sub>-CD<sub>3</sub>CN, δ = 1,943 ppm, T = 300K)**

1,327 CH<sub>3</sub>(tert.-butyl, 18H, s)  
1,434 CH<sub>3</sub>(tert.-butyl, 18H, s)  
7,256 HB' (2H, d(lc))  
7,353 H5, H6, H7 (10H, m);  
7,475 HB (2H, d(lc))  
7,620 HA' (2H, d);  
7,694 HA (2H, d);  
7,896 H2 (2H, dd);  
8,146 H3 (2H, d(lc));  
8,422 H4 (2H, s);  
8,512 HC' (2H, s);  
8,551 HC (2H, s);  
9,589 H1 (2H, d);

(tbbpy)<sub>2</sub>Ru(dppz(BPh)<sub>2</sub>) RuL3

---

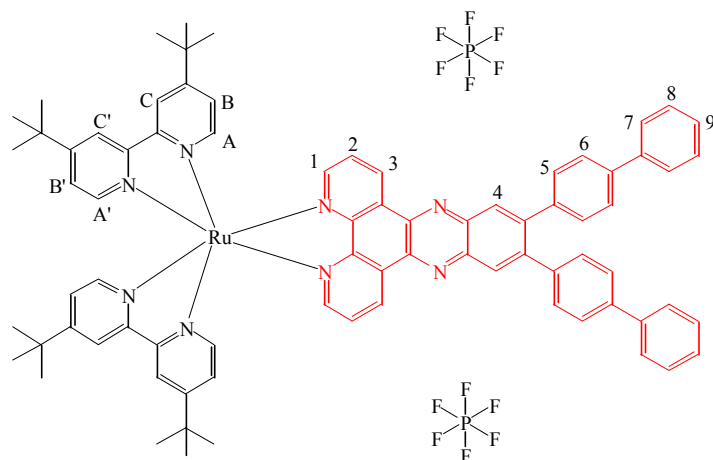

**<sup>1</sup>H-NMR (d<sub>3</sub>-CD<sub>3</sub>CN, δ = 1,930 ppm, T = 300 K)**

[Dez07-2004, EXPNO 30, 400MHz]

1,277 CH<sub>3</sub>(tert.-butyl, 18H, s)

1,471 CH<sub>3</sub>(tert.-butyl, 18H, s)

7,412 H<sub>7</sub>, H<sub>8</sub>, H<sub>9</sub> (10H, m)

7,211 H<sub>6</sub> (4H, d);

7,272 H<sub>5</sub> (4H, d)

7,348 H<sub>B'</sub> (2H, d);

7,522 H<sub>B</sub> (2H, d);

7,772 H<sub>A</sub>, H<sub>A'</sub> (4H, d);

7,799 H<sub>2</sub> (2H, dd);

7,968 H<sub>4</sub> (2H, s);

8,241 H<sub>3</sub> (2H, d);

8,571 H<sub>C</sub> (2H, s);

8,639 H<sub>C'</sub> (2H, s);

9,175 H<sub>1</sub> (2H, d);

(tbbpy)<sub>2</sub>Ru(dppz(TBPh)<sub>2</sub>) RuL<sub>4</sub>

---

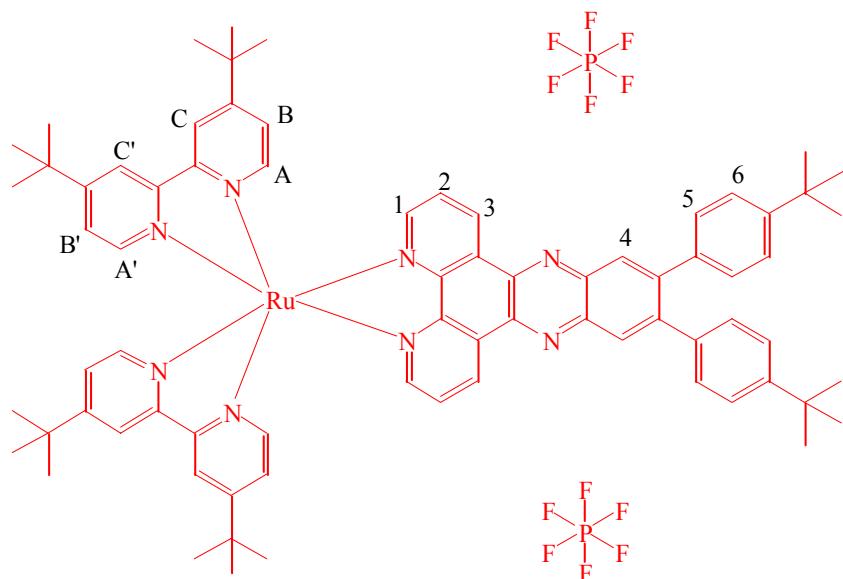

<sup>1</sup>H-NMR (CD<sub>3</sub>CN, δ = 1,949 ppm, T = 300K)

1,312 CH<sub>3</sub>(tert-butyl, 18H, s)  
1,329 CH<sub>3</sub>(tert-butyl, 18H, s)  
1,468 CH<sub>3</sub>(tert-butyl, 18H, s)

7,228 H<sub>6</sub>, H<sub>5</sub>(8H, m);  
7,328 H<sub>B'</sub> (2H, d(lc));  
7,505 H<sub>B</sub> (2H, d(lc));  
7,703 H<sub>A'</sub> (2H, d);  
7,736 H<sub>A</sub> (2H, d);  
7,774 H<sub>2</sub> (2H, dd);  
8,031 H<sub>4</sub> (2H, s);  
8,161 H<sub>3</sub> (2H, (lc));  
8,517 H<sub>C'</sub> (2H, s);  
8,566 H<sub>C</sub> (2H, s);  
9,268 H<sub>1</sub> (2H, d(lc));
